# Supplementary material for: Human papillomavirus and vaccine-related perceptions among men who have sex with men: a systematic review
Source: HighWire-hosted journal article supplement (doi:10.1136/sextrans-2013-051357), 2014-04-30
Supplement: sextrans-2013-051357supp_PolishAbstract.pdf [file sextrans-2013-051357supp_PolishAbstract.pdf]

**Tytuł:** Postawy wobec szczepienia przeciwko wirusowi brodawczaka ludzkiego (HPV) wśród mężczyzn, którzy mają kontakty seksualne z mężczyznami (MSM).

**Wprowadzenie:** Selektywne szczepienie przeciwko wirusowi brodawczaka ludzkiego (HPV) może uchronić mężczyzn, którzy mają kontakty seksualne z mężczyznami (MSM) przed brodawkami wenerycznymi oraz rakiem odbytu lub jamy ustnej. W celu opracowania skutecznych programów szczepień dla MSM, ważne jest aby zrozumieć poziom wiedzy tych mężczyzn na temat HPV oraz ich postawy wobec szczepienia.

**Metoda:** W celu znalezienia publikacji na temat zapatrywań i stanowiska MSM związanych z HPV zostało systematycznie przeanalizowanych dziesięć baz wiedzy medycznej. Każdy analizowany artykuł został poddany ocenie jakościowej w celu określenia potencjalnych kierunków badawczych w kontekście selektywnego szczepienia przeciwko HPV dla mężczyzn.

**Rezultat:** Zidentyfikowaliśmy szesnaście badań, głównie przeprowadzonych w Ameryce Północnej. Większość badanych mężczyzn (N = 5185) w wieku powyżej 26 lat, posiadała znikomą wiedzę o HPV i nie utożsamiała się z ryzykiem infekcji. Ponad połowa mężczyzn (MSM) była w stanie wykazać gotowość by poddać się szczepieniu. Zaobserwowane wśród badanych duże zróżnicowanie w okazaniu gotowości spowodowane było ograniczonym zaufaniem do niejednorodnych sposobów badawczych oraz niskim poziomem wiedzy o szczepionce przeciwko HPV.

**Konkluzja:** Pomimo niedostatecznej wiedzy o HPV, większość MSM wykazuje gotowość by poddać się szczepieniu. Dalsze poszukiwania powinny określić, które czynniki wpłynęłyby na akceptację szczepionki u tych mężczyzn i potencjalne uczestnictwo w programach szczepień. Przyszłe badania muszą skupić się na MSM z niewielkim doświadczeniem seksualnym, gdyż ci mężczyźni czerpaliby największe korzyści ze szczepienia przeciwko HPV.

**Disclaimer:** BMJ Publishing Group Limited takes no responsibility for the accuracy of the translation from the published English original and is not liable for any errors that may occur.
